# Supplementary material for: One Small Step for a Yeast - Microevolution within Macrophages Renders Candida glabrata Hypervirulent Due to a Single Point Mutation
Source: PubMed Central journal article supplement (PMC4214790; doi:10.1371/journal.ppat.1004478), 2014-10-30

### Chicken embryo survival

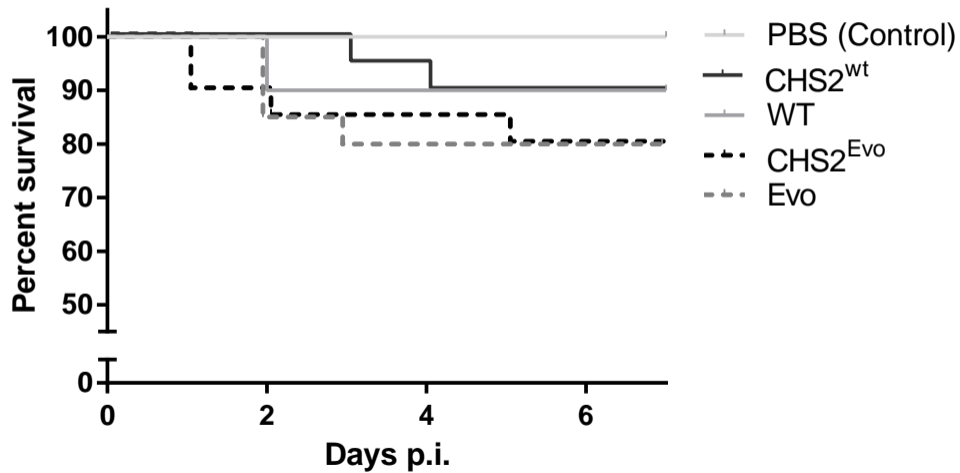

### Chicken embryo survival

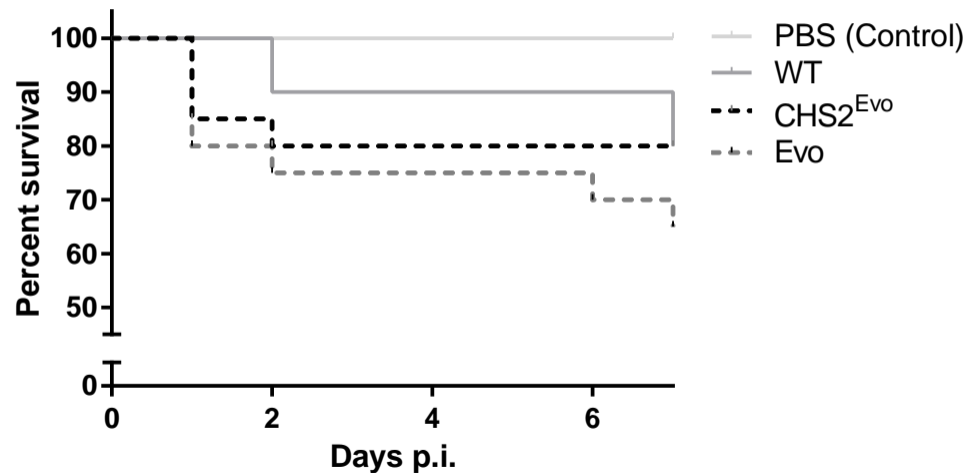

Supplement: ppat.1004478.s004.pdf [file ppat.1004478.s004.pdf]
