# Supplementary material for: One Small Step for a Yeast - Microevolution within Macrophages Renders Candida glabrata Hypervirulent Due to a Single Point Mutation
Source: PubMed Central journal article supplement (PMC4214790; doi:10.1371/journal.ppat.1004478), 2014-10-30
Supplement: ppat.1004478.s005.pdf [file ppat.1004478.s005.pdf]

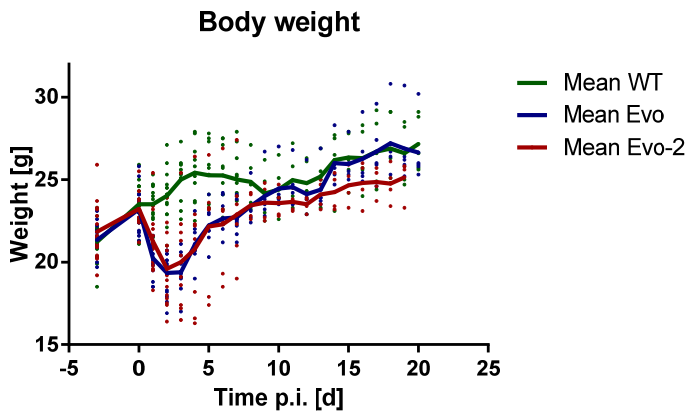

Comparison of weight loss induced in mice by infection with WT, Evo, or the additional Evo-2 strain.

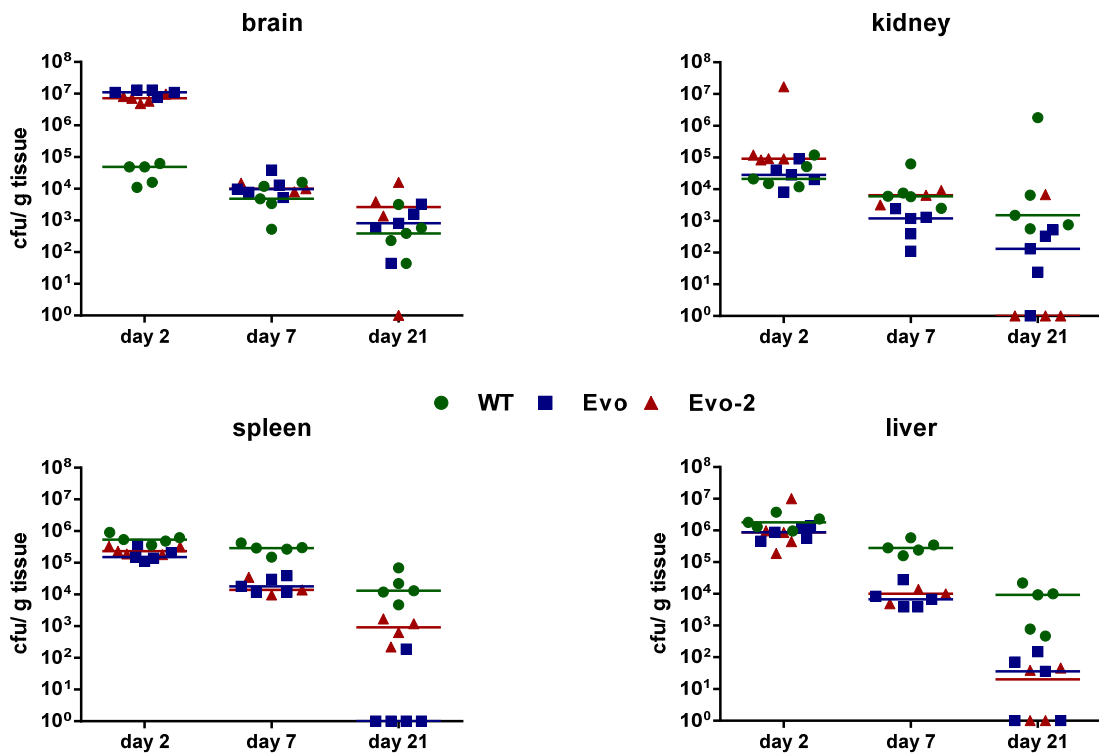

Comparison of fungal burden in different murine organs after infection with WT, Evo, or the additional Evo-2 strain. Individual data points and median are shown for all three strains.
