# Supplementary material for: One Small Step for a Yeast - Microevolution within Macrophages Renders Candida glabrata Hypervirulent Due to a Single Point Mutation
Source: PubMed Central journal article supplement (PMC4214790; doi:10.1371/journal.ppat.1004478), 2014-10-30
Supplement: ppat.1004478.s010.pdf [file ppat.1004478.s010.pdf]

**Supplemental Table S1. Histological evaluation of microcolony numbers and sizes of Wt and Evo strain in the mouse brain at day 2 p.i.**

|     | <b>#Sections</b> | <b>Aggregates/<br/>section</b> | <b>Microcolonies/<br/>section</b> | <b>Mean colony<br/>area [<math>\mu\text{m}^2</math>]</b> | <b>Max colony<br/>area [<math>\mu\text{m}^2</math>]</b> | <b>Total area<br/>[<math>\mu\text{m}^2</math>/section]</b> |
|-----|------------------|--------------------------------|-----------------------------------|----------------------------------------------------------|---------------------------------------------------------|------------------------------------------------------------|
| WT  | <b>13</b>        | 0,15                           | 0,31                              | 1318                                                     | 2480                                                    | 410                                                        |
| Evo | <b>13</b>        | 4,00                           | 34,69                             | 2080                                                     | 10700                                                   | 72245                                                      |
