# Supplementary material for: One Small Step for a Yeast - Microevolution within Macrophages Renders Candida glabrata Hypervirulent Due to a Single Point Mutation
Source: PubMed Central journal article supplement (PMC4214790; doi:10.1371/journal.ppat.1004478), 2014-10-30
Supplement: ppat.1004478.s011.pdf [file ppat.1004478.s011.pdf]

**Supplemental Table S2: Coverage and sequencing depth statistics for the genome sequences of the *C. glabrata* wild type (WT) and evolved strain (Evo)**

| Chromosome | Reference size | WT                  |                           |                  | Evo                 |                           |                  |
|------------|----------------|---------------------|---------------------------|------------------|---------------------|---------------------------|------------------|
|            |                | Nucleotides covered | Coverage (% of reference) | Sequencing depth | Nucleotides covered | Coverage (% of reference) | Sequencing depth |
| A          | 491328         | 472707              | 96.2                      | 68.4             | 472729              | 96.2                      | 70.7             |
| B          | 502101         | 496265              | 98.8                      | 67.7             | 496217              | 98.8                      | 70.8             |
| C          | 558804         | 532668              | 95.3                      | 69.4             | 532661              | 95.3                      | 71.1             |
| D          | 651701         | 637791              | 97.9                      | 68.0             | 637810              | 97.9                      | 70.7             |
| E          | 687738         | 672186              | 97.7                      | 66.7             | 672148              | 97.7                      | 69.9             |
| F          | 927101         | 921503              | 99.4                      | 66.1             | 921569              | 99.4                      | 69.8             |
| G          | 992211         | 984262              | 99.2                      | 66.5             | 984232              | 99.2                      | 69.8             |
| H          | 1050361        | 1040472             | 99.1                      | 65.3             | 1040438             | 99.1                      | 69.6             |
| I          | 1100349        | 1069163             | 97.2                      | 65.6             | 1069045             | 97.2                      | 69.5             |
| J          | 1195129        | 1179649             | 98.7                      | 66.1             | 1179679             | 98.7                      | 69.3             |
| K          | 1302831        | 1296723             | 99.5                      | 71.8             | 1296701             | 99.5                      | 76.1             |
| L          | 1455689        | 1430343             | 98.3                      | 87.7             | 1430327             | 98.3                      | 91.0             |
| M          | 1402899        | 1396393             | 99.5                      | 66.3             | 1396372             | 99.5                      | 70.1             |
| All        | 12318242       | 12130125            | 98.5                      | 69.6             | 12129928            | 98.5                      | 73.1             |
