# Supplementary material for: One Small Step for a Yeast - Microevolution within Macrophages Renders Candida glabrata Hypervirulent Due to a Single Point Mutation
Source: PubMed Central journal article supplement (PMC4214790; doi:10.1371/journal.ppat.1004478), 2014-10-30
Supplement: ppat.1004478.s012.pdf [file ppat.1004478.s012.pdf]

**Supplemental Table S3: Single Nucleotide Polymorphisms relative to the ATCC2001 reference genome and observed in sequencing data for the strains wild type (WT) and/or evolved strain (Evo). For stop codon→amino acid exchanges, number of additional amino acids in ORF are indicated in brackets. WGS, whole genome sequencing data; Syn, synonymous nucleotide exchange.**

| Chromosome | Position | Ref. | WGS |     | ORF          | Pseudo-gene? | Impact      | Sanger |     |
|------------|----------|------|-----|-----|--------------|--------------|-------------|--------|-----|
|            |          |      | WT  | Evo |              |              |             | WT     | Evo |
| Cagl0A     | 209366   | C    | A   | A   | CAGL0A01980g |              | G325C       |        |     |
| Cagl0B     | 3151     | G    | A   | A   | CAGL0B00110g | *            | Syn         |        |     |
| Cagl0B     | 498890   | G    | C   | C   | CAGL0B05093g | *            | *231Y (+29) |        |     |
| Cagl0B     | 499083   | T    | A   | A   | CAGL0B05093g | *            | (past STOP) | A      | A   |
| Cagl0B     | 499127   | G    | A   | A   | CAGL0B05093g | *            | (past STOP) | A      | A   |
| Cagl0C     | 895      | G    | A   | A   | Intergenic   |              | -           |        |     |
| Cagl0C     | 28197    | G    | A   | A   | CAGL0C00275g |              | V29I        | A      | A   |
| Cagl0C     | 90126    | C    | T   | T   | Intergenic   |              | -           |        |     |
| Cagl0C     | 90693    | A    | C   | C   | Intergenic   |              | -           |        |     |
| Cagl0C     | 90697    | G    | A   | A   | Intergenic   |              | -           |        |     |
| Cagl0C     | 100048   | C    | T   | T   | Intergenic   |              | -           |        |     |
| Cagl0C     | 108117   | A    | C   | C   | Intergenic   |              | -           |        |     |
| Cagl0C     | 382148   | A    | C   | C   | CAGL0C03894g |              | V417G       |        |     |
| Cagl0D     | 4641     | T    | A   | A   | CAGL0D00110g | *            | I267L       |        |     |
| Cagl0F     | 90968    | T    | G   | G   | CAGL0F00803g |              | *839G (+81) | G      | G   |
| Cagl0F     | 233920   | A    | T   | T   | Intergenic   |              | -           |        |     |
| Cagl0G     | 47674    | C    | A   | A   | Intergenic   |              | -           |        |     |
| Cagl0G     | 330677   | G    | A   | A   | CAGL0G03421g |              | Syn         |        |     |
| Cagl0G     | 402260   | A    | G   | G   | Intergenic   |              | -           |        |     |
| Cagl0G     | 653876   | A    | C   | C   | CAGL0G06842g |              | H53Q        |        |     |
| Cagl0G     | 653922   | A    | C   | C   | CAGL0G06842g |              | D77E        |        |     |
| Cagl0G     | 653994   | A    | C   | C   | CAGL0G06842g |              | Y93D        |        |     |
| Cagl0G     | 815281   | T    | G   | G   | CAGL0G08646g |              | N418T       | G      | G   |
| Cagl0G     | 931981   | C    | A   | A   | CAGL0G09757g |              | P544H       | A      | A   |
| Cagl0H     | 4863     | A    | C   | C   | CAGL0H00132g | *            | Syn         |        |     |
| Cagl0H     | 5167     | A    | T   | T   | CAGL0H00132g | *            | Syn         |        |     |
| Cagl0H     | 6287     | A    | T   | T   | CAGL0H00132g | *            | Syn         |        |     |
| Cagl0H     | 6293     | G    | C   | C   | CAGL0H00132g | *            | Syn         |        |     |
| Cagl0H     | 6294     | G    | T   | T   | CAGL0H00132g | *            | Syn         |        |     |
| Cagl0H     | 6323     | G    | C   | C   | CAGL0H00132g | *            | Syn         |        |     |
| Cagl0H     | 6335     | G    | C   | C   | CAGL0H00132g | *            | Syn         |        |     |
| Cagl0H     | 6724     | C    | A   | A   | CAGL0H00132g | *            | Syn         |        |     |
| Cagl0H     | 7020     | C    | T   | T   | CAGL0H00132g | *            | Syn         |        |     |
| Cagl0H     | 7041     | T    | A   | A   | CAGL0H00132g | *            | Syn         |        |     |
| Cagl0H     | 963528   | T    | C   | C   | intergenic   |              | -           |        |     |
| Cagl0I     | 38190    | A    | C   | C   | CAGL0I00506g |              | W605G       |        |     |
| Cagl0J     | 247572   | T    | A   | T   | CAGL0J02508g |              | Syn         | A      | A   |
| Cagl0J     | 398441   | C    | A   | A   | CAGL0J04246g |              | P120Q       | A      | A   |

|        |         |   |   |   |              |   |              |   |   |
|--------|---------|---|---|---|--------------|---|--------------|---|---|
| Cagl0J | 839430  | G | A | A | Intergenic   |   | -            |   |   |
| Cagl0J | 1004938 | C | T | T | CAGL0J10274g |   | R318K        |   |   |
| Cagl0J | 1096487 | T | C | C | CAGL0J11264g |   | Q362R        |   |   |
| Cagl0J | 1189483 | C | T | T | CAGL0J11990g | * | (past STOP)  |   |   |
| Cagl0J | 1189759 | A | G | G | CAGL0J11990g | * | Syn          |   |   |
| Cagl0J | 1189787 | A | G | G | CAGL0J11990g | * | (past STOP)  |   |   |
| Cagl0K | 556803  | C | T | T | CAGL0K05709g |   | G1081S       | T | T |
| Cagl0L | 94123   | T | C | C | CAGL0L00737g |   | E320G        |   |   |
| Cagl0L | 378498  | G | A | A | Intergenic   |   | -            |   |   |
| Cagl0L | 785242  | C | A | A | Intergenic   |   | -            |   |   |
| Cagl0L | 941345  | A | C | C | CAGL0L08624g |   | S430R        |   |   |
| Cagl0L | 1072858 | A | C | C | CAGL0L09955g | * | *206S (+279) | C | C |
| Cagl0L | 1263007 | T | C | C | CAGL0L11792g |   | Syn          |   |   |
| Cagl0M | 163650  | T | C | T | Intergenic   |   | -            |   |   |
| Cagl0M | 926262  | A | G | G | CAGL0M09317g |   | K7E          |   |   |
| Cagl0M | 1033820 | A | C | C | Intergenic   |   | -            |   |   |
| Cagl0M | 1151034 | G | A | A | CAGL0M11616g |   | Syn          |   |   |
| Cagl0M | 1242726 | A | C | C | CAGL0M12474g |   | T151P        |   |   |
